# Supplementary material for: Association Between Antipsychotic Polypharmacy and Outcomes for People With Serious Mental Illness in England
Source: Atypon-hosted journal article supplement (doi:10.1176/appi.ps.201800504), 2019-05-21
Supplement: appi.ps.201800504.ds001.pdf [file appi.ps.201800504.ds001.pdf]

## Online Supplement

Association between antipsychotic polypharmacy and outcomes for people with serious mental illness in England.

### Antipsychotic product codes

We downloaded the antipsychotic drug codes list from the ClinicalCodes database (<https://clinicalcodes.rss.mhs.man.ac.uk/>) - a web repository of clinical codes developed by the University of Manchester Institute of Population Health<sup>1</sup>. The repository holds a collection of peer-reviewed articles and the associated codes used irrespective of code type (e.g. Read, CPRD product/medical code, BNF code, ICD-10) and database (e.g. CPRD, THIN). We used the list of antipsychotic drug codes uploaded by Windfuhr et al<sup>2</sup>. The list includes three British National Formulary (<http://www.bnf.org>) chapter headings: first-generation antipsychotic drugs (FGAs) or typical antipsychotics, second-generation antipsychotics (SGAs) or atypical antipsychotics, and depot antipsychotics. From the list of 33 antipsychotic substances presented in Table S1, 27 were recorded at least once in our sample.

**Table: Product codes used to identify antipsychotic substances**

| <b>Substance</b> |                        | <b>Product codes</b> |          |          |          |          |          |          |          |          |          |
|------------------|------------------------|----------------------|----------|----------|----------|----------|----------|----------|----------|----------|----------|
| 1                | <b>Amisupride*</b>     | 80139020             | 68222020 | 81945020 | 35008020 | 35010020 | 85993020 | 69302020 | 68224020 | 00411021 | 89950020 |
|                  |                        | 85994020             | 85992020 | 68217020 | 80154020 | 79348020 | 86000020 | 86001020 | 85999020 |          |          |
| 2                | <b>Aripiprazole</b>    | 91145020             | 87950020 | 91147020 | 87952020 | 91149020 | 87954020 | 88668020 | 10469020 | 94973020 | 91139020 |
|                  |                        | 87944020             | 91141020 | 87946020 | 91143020 | 87948020 | 88666020 | 94971020 |          |          |          |
| 3                | <b>Asenapine</b>       | 00341021             | 337021   |          |          |          |          |          |          |          |          |
| 4                | <b>Benperidol</b>      | 64108020             | 98282020 | 64105020 | 84860020 |          |          |          |          |          |          |
| 5                | <b>Chlorpromazine</b>  | 61251020             | 61249020 | 61250020 | 72606020 | 61237020 | 58896020 | 55203020 | 72588020 | 55710020 | 72587020 |
|                  |                        | 68531020             | 55217020 | 58894020 | 55204020 | 66353020 | 91404020 | 61244020 | 65188020 | 52087020 | 61238020 |
|                  |                        | 72597020             | 55228020 | 68532020 | 60250020 | 55202020 | 66356020 | 91408020 | 61243020 | 61264020 | 56481020 |
|                  |                        | 56450020             | 56444020 | 56445020 | 73791020 | 56446020 | 56468020 | 56456020 |          |          |          |
| 6                | Chlorprothixine        | 51832020             |          |          |          |          |          |          |          |          |          |
| 7                | <b>Clozapine</b>       | 72581020             | 97149020 | 72580020 | 97145020 | 97153020 | 72577020 | 72576020 | 88169020 | 97151020 | 88167020 |
|                  |                        | 97147020             | 97155020 | 88806020 | 88804020 |          |          |          |          |          |          |
| 8                | <b>Droperidol</b>      | 58513020             | 72300020 | 58514020 | 62878020 | 62879020 | 72297020 | 94599020 |          |          |          |
| 9                | <b>Flupentixol</b>     | 48897020             | 62029020 | 48900020 | 91584020 | 53030020 | 53031020 | 89976020 | 89974020 | 57938020 | 89972020 |
|                  |                        | 62034020             | 91582020 | 68096020 | 89970020 | 62033020 | 62032020 |          |          |          |          |
| 10               | <b>Fluphenazine</b>    | 62037020             | 62042020 | 50459020 | 50472020 | 92214020 | 62049020 | 92200020 | 92202020 | 61027020 | 62048020 |
|                  |                        | 62954020             | 92212020 | 92204020 | 92206020 | 92208020 | 50445020 | 92210020 | 92218020 | 53053020 | 92216020 |
| 11               | Fluspirilene           | 62066020             | 51357020 |          |          |          |          |          |          |          |          |
| 12               | <b>Haloperidol</b>     | 63137020             | 63136020 | 58501020 | 58505020 | 58502020 | 58500020 | 95205020 | 58506020 | 63104020 | 55437020 |
|                  |                        | 53896020             | 54580020 | 75300020 | 63108020 | 99757020 | 60366020 | 63114020 | 511021   | 00443021 | 63115020 |
|                  |                        | 55438020             | 53576020 | 63110020 | 78059020 | 63109020 | 88468020 | 20065020 | 20067020 | 75301020 | 53575020 |
|                  |                        | 75302020             | 63113020 | 63118020 | 59312020 | 59028020 | 63105020 | 53898020 | 55351020 | 95203020 | 99755020 |
|                  |                        | 72226020             | 55346020 | 91764020 | 56176020 | 56181020 | 56182020 | 56183020 | 56175020 | 56177020 | 56187020 |
|                  |                        | 58510020             | 58509020 | 63124020 |          |          |          |          |          |          |          |
| 13               | Integrin               | 49952020             | 65318020 |          |          |          |          |          |          |          |          |
| 14               | <b>Levomepromazine</b> | 87842020             | 38919020 | 64327020 | 64326020 | 32615020 | 97323020 | 87840020 | 52695020 | 3365020  | 52694020 |
| 15               | Methotrimeprazine      | 64330020             |          |          |          |          |          |          |          |          |          |

|    |                         |          |          |          |          |          |          |          |          |          |          |
|----|-------------------------|----------|----------|----------|----------|----------|----------|----------|----------|----------|----------|
| 16 | <b>Olanzapine</b>       | 00719021 | 81016020 | 00717021 | 00715021 | 87556020 | 83405020 | 00727021 | 55972020 | 00725021 | 00723021 |
|    |                         | 59434020 | 81014020 | 03580020 | 00733021 | 90165020 | 00731021 | 00729021 | 92053020 | 00713021 | 81015020 |
|    |                         | 00711021 | 00709021 | 83403020 | 83404020 | 00589021 | 87558020 | 83399020 | 78913020 | 58203020 | 79499020 |
|    |                         | 81008020 | 92055020 | 90167020 | 83397020 | 78912020 | 83398020 | 98278020 | 98329020 |          |          |
| 17 | <b>Paliperidone</b>     | 93747020 | 93739020 | 93741020 | 93743020 | 99845020 | 99847020 | 99841020 | 99843020 | 99853020 | 99855020 |
|    |                         | 99849020 | 99851020 |          |          |          |          |          |          |          |          |
| 18 | <b>Pericyazine</b>      | 50678020 | 96724020 | 50677020 | 96722020 | 50679020 | 52648020 | 65580020 | 65584020 | 65579020 | 65581020 |
| 19 | <b>Perphenazine</b>     | 49428020 | 49429020 | 53721020 | 65588020 | 65592020 | 65593020 | 56832020 | 65589020 | 56833020 | 65587020 |
|    |                         | 52047020 |          |          |          |          |          |          |          |          |          |
| 20 | <b>Pimozide</b>         | 58519020 | 58518020 | 65799020 | 65798020 |          |          |          |          |          |          |
| 21 | <b>Pipotizine</b>       | 53586020 | 91989020 | 91987020 | 91985020 | 91981020 | 65842020 |          |          |          |          |
| 22 | <b>Prochlorperazine</b> | 68249020 | 91364020 | 54878020 | 66241020 | 66242020 | 66237020 | 54234020 | 57101020 | 69868020 | 60605020 |
|    |                         | 55530020 | 56337020 | 66245020 | 69516020 | 69517020 | 72187020 | 56506020 | 91368020 | 58525020 | 52717020 |
|    |                         | 52716020 | 51690020 | 04131020 | 4128020  | 04129020 | 96911020 | 04123020 | 51692020 | 96913020 | 52248020 |
|    |                         | 52249020 |          |          |          |          |          |          |          |          |          |
| 23 | <b>Promazine</b>        | 72991020 | 66279020 | 51749020 | 72987020 | 66278020 | 55705020 | 72988020 | 51751020 | 66277020 | 66283020 |
|    |                         | 66282020 | 55706020 | 72183020 | 72184020 | 58296020 | 52959020 | 52957020 | 52958020 | 52968020 | 51649020 |
| 24 | <b>Quetiapine</b>       | 85204020 | 97203020 | 97205020 | 00209021 | 00447021 | 98873020 | 85207020 | 94789020 | 85206020 | 85203020 |
|    |                         | 42176020 | 33610020 | 99745020 | 94791020 | 87045020 | 94793020 | 94787020 | 36328020 | 85202020 | 85213020 |
|    |                         | 85216020 | 85215020 | 85212020 | 87047020 | 98875020 | 95789020 | 95791020 | 95793020 | 95787020 |          |
| 25 | Remoxipride             | 73439020 | 73440020 | 73441020 | 73474020 | 73475020 | 84528020 |          |          |          |          |
| 26 | <b>Risperidone</b>      | 49437020 | 73799020 | 49438020 | 49439020 | 73798020 | 77749020 | 73800020 | 78753020 | 77550020 | 82616020 |
|    |                         | 13768020 | 81545020 | 77501020 | 92723020 | 92725020 | 88877020 | 36905020 | 79476020 | 53727020 | 74841020 |
|    |                         | 49490020 | 86494020 | 81543020 | 53728020 | 86496020 | 92717020 | 53729020 | 92721020 | 49489020 | 88875020 |
|    |                         | 77912020 | 74927020 | 74786020 | 65788020 | 49491020 |          |          |          |          |          |
| 27 | <b>Sertindole</b>       | 82836020 | 82837020 | 82835020 | 82828020 | 82829020 | 82831020 | 82827020 |          |          |          |
| 28 | <b>Sulpiride</b>        | 52921020 | 52922020 | 80696020 | 66836020 | 60498020 | 56102020 | 56529020 | 59205020 | 66837020 | 66838020 |
|    |                         | 59150020 | 82057020 |          |          |          |          |          |          |          |          |
| 29 | <b>Thioridazine</b>     | 54413020 | 67032020 | 75277020 | 67027020 | 67037020 | 54418020 | 54411020 | 67028020 | 67036020 | 67038020 |
|    |                         | 54412020 | 67029020 | 75276020 | 55600020 |          |          |          |          |          |          |
| 30 | <b>Trifluoperazine</b>  | 51013020 | 51663020 | 51681020 | 51676020 | 51678020 | 51687020 | 51677020 | 87980020 | 67148020 | 67234020 |

|                          |          |          |          |          |          |          |          |          |          |          |
|--------------------------|----------|----------|----------|----------|----------|----------|----------|----------|----------|----------|
|                          | 75976020 | 55747020 | 75977020 | 67240020 | 67235020 | 55746020 | 67241020 | 69003020 |          |          |
| 31 Trifluoperidol        | 67244020 | 67245020 | 67248020 | 67249020 |          |          |          |          |          |          |
| 32 <b>Zotepine</b>       | 55209020 | 55210020 | 50782020 | 50780020 | 50781020 |          |          |          |          |          |
| 33 <b>Zuclopenthixol</b> | 48713020 | 48714020 | 48712020 | 90151020 | 90149020 | 72839020 | 61507020 | 61508020 | 61506020 | 90147020 |
|                          | 90145020 | 72836020 | 91596020 | 53027020 | 67405020 | 91592020 | 61511020 | 61512020 |          |          |

---

\*in bold the 27 substances that were recorded at least once in our sample

## Calculation of treatment duration

To mark the beginning and end of an APP episode we need information about the prescription date and the number of days the antipsychotic drug was prescribed. The CPRD therapy file provides the prescription date but the treatment duration is poorly populated with 99% missing values for antipsychotic drugs. The reason is that in most cases, GPs prescribe the quantity a patient should use until it runs out and therefore they are not interested in recording the duration of the prescription.

To overcome this problem we calculated the treatment duration as the ratio of the total quantity entered by the GP for the prescribed product (qty) over the numeric daily dose (nnd) prescribed for the event (drug). Because information on nnd is missing for over 23% of the therapy events we employ the following imputation strategy: to events with missing nnd we assigned the most frequent nnd across all events with the specific product code. About 1% of the therapy events involve a product for which all events have missing nnd. For these events, we imputed the nnd by assigning the most frequent nnd across all events with the specific substance.

Estimating the treatment duration as the ratio  $qty/nnd$  was further complicated by another two issues. First, while pack size or type of the prescribed product is provided (e.g. 560 ML, 21 tablets) the unit in which nnd is recorded is not and in some cases it is obvious that qty and nnd are recorded in different units (e.g.  $qty=21$  tablets,  $nnd=300$ ). In these cases we divided nnd by the strength of the prescribed substance to impute the true nnd (e.g.  $nnd=300/100mg=3$  tablets). Second, less than 0.02% of prescription records (245 of 1,035,856) had an implausibly large calculated duration and were dropped from the analysis.

**Table: Read codes used to identify SMI diagnostic categories**

| Category                                 | Read codes |         |         |         |         |         |         |         |         |         |
|------------------------------------------|------------|---------|---------|---------|---------|---------|---------|---------|---------|---------|
| Schizophrenia and other psychoses        | E100.00    | E100.11 | E100000 | E100100 | E100200 | E100300 | E100400 | E100500 | E100z00 | E101.00 |
|                                          | E101000    | E101400 | E101500 | E101z00 | E102.00 | E102000 | E102100 | E102500 | E102z00 | E103.00 |
|                                          | E103000    | E103200 | E103300 | E103400 | E103500 | E103z00 | E104.00 | E105.00 | E105000 | E105200 |
|                                          | E105500    | E105z00 | E106.00 | E107.00 | E107.11 | E107000 | E107100 | E107200 | E107300 | E107400 |
|                                          | E107500    | E107z00 | E10y.00 | E10y.11 | E10y000 | E10y100 | E10yz00 | E10z.00 | E120.00 | E121.00 |
|                                          | E122.00    | E123.00 | E123.11 | E12y.00 | E12y000 | E12yz00 | E12z.00 | E13..00 | E13..11 | E131.00 |
|                                          | E132.00    | E133.00 | E133.11 | E134.00 | E13y.00 | E13y100 | E13yz00 | E13z.00 | E13z.11 | E1z..00 |
|                                          | E212200    | Eu20.00 | Eu20000 | Eu20011 | Eu20100 | Eu20111 | Eu20200 | Eu20211 | Eu20212 | Eu20213 |
|                                          | Eu20214    | Eu20300 | Eu20311 | Eu20400 | Eu20500 | Eu20511 | Eu20600 | Eu20y00 | Eu20y12 | Eu20y13 |
|                                          | Eu20z00    | Eu21.00 | Eu21.11 | Eu21.12 | Eu21.13 | Eu21.14 | Eu21.15 | Eu21.16 | Eu21.17 | Eu21.18 |
|                                          | Eu22.00    | Eu22000 | Eu22011 | Eu22012 | Eu22013 | Eu22014 | Eu22015 | Eu22100 | Eu22111 | Eu22200 |
|                                          | Eu22300    | Eu22y00 | Eu22y11 | Eu22y12 | Eu22y13 | Eu22z00 | Eu23.00 | Eu23000 | Eu23011 | Eu23012 |
|                                          | Eu23100    | Eu23112 | Eu23200 | Eu23211 | Eu23212 | Eu23214 | Eu23300 | Eu23312 | Eu23y00 | Eu23z00 |
|                                          | Eu23z11    | Eu23z12 | Eu24.00 | Eu24.12 | Eu24.13 | Eu25.00 | Eu25000 | Eu25011 | Eu25012 | Eu25100 |
|                                          | Eu25111    | Eu25112 | Eu25200 | Eu25212 | Eu25y00 | Eu25z00 | Eu25z11 | Eu26.00 | Eu2y.00 | Eu2y.11 |
|                                          | Eu2z.00    | Eu2z.11 | Eu44.14 |         |         |         |         |         |         |         |
| Bipolar disorder and affective psychoses | E11..00    | E11..12 | E110.00 | E110.11 | E110000 | E110100 | E110200 | E110300 | E110400 | E110600 |
|                                          | E110z00    | E111.00 | E111000 | E111100 | E111200 | E111300 | E111400 | E111500 | E111600 | E111z00 |
|                                          | E112400    | E113400 | E114.00 | E114.11 | E114000 | E114100 | E114200 | E114300 | E114400 | E114500 |
|                                          | E114600    | E114z00 | E115.00 | E115.11 | E115000 | E115100 | E115200 | E115300 | E115400 | E115500 |
|                                          | E115600    | E115z00 | E116.00 | E116000 | E116100 | E116200 | E116300 | E116400 | E116500 | E116600 |
|                                          | E116z00    | E117.00 | E117000 | E117100 | E117200 | E117300 | E117400 | E117500 | E117600 | E117z00 |
|                                          | E11y.00    | E11y000 | E11y100 | E11y300 | E11yz00 | E11z.00 | E11z000 | E11zz00 | E130.00 | E130.11 |
|                                          | E13y000    | Eu30.00 | Eu30.11 | Eu30000 | Eu30100 | Eu30200 | Eu30211 | Eu30212 | Eu30y00 | Eu30z00 |
|                                          | Eu30z11    | Eu31.00 | Eu31.11 | Eu31.12 | Eu31.13 | Eu31000 | Eu31100 | Eu31200 | Eu31300 | Eu31400 |
|                                          | Eu31500    | Eu31600 | Eu31700 | Eu31800 | Eu31900 | Eu31911 | Eu31y00 | Eu31y11 | Eu31y12 | Eu31z00 |
|                                          | Eu32300    | Eu32311 | Eu32312 | Eu32313 | Eu32314 | Eu32800 | Eu33213 | Eu33300 | Eu33311 | Eu33312 |



**Table: Covariates**

| Measured at the date of entry to the study sample                                             |                                                 |                                                                                                                                                                                                                                                                                                                                                                  |
|-----------------------------------------------------------------------------------------------|-------------------------------------------------|------------------------------------------------------------------------------------------------------------------------------------------------------------------------------------------------------------------------------------------------------------------------------------------------------------------------------------------------------------------|
| Variable                                                                                      | Type                                            | Details                                                                                                                                                                                                                                                                                                                                                          |
| Age                                                                                           | Categorical<br>(19-35,36-45, 46-55, 56-65, >65) | CPRD Read codes                                                                                                                                                                                                                                                                                                                                                  |
| Male                                                                                          | Binary                                          | CPRD Read codes                                                                                                                                                                                                                                                                                                                                                  |
| IMD<br>(Deprivation level associated with patient's residence area)                           | Categorical (Quintiles)                         | For practices that have consented to participate in the linkage scheme, the patient postcode of residence is mapped to LSOA using a postcode lookup file. The LSOA of residence then allows linkage to the 2010 English Index of Multiple Deprivation.                                                                                                           |
| Number of Charlson Index comorbidities                                                        | Categorical<br>0, 1, 2, >=3                     | CPRD Read codes recorded any time before the date of entry to the study sample.                                                                                                                                                                                                                                                                                  |
| Depression diagnosis                                                                          | Binary                                          | CPRD Read codes                                                                                                                                                                                                                                                                                                                                                  |
| Alcohol status                                                                                | Binary                                          | Diagnostic or management codes recorded in CPRD.                                                                                                                                                                                                                                                                                                                 |
| Smoking status                                                                                |                                                 |                                                                                                                                                                                                                                                                                                                                                                  |
| Number of GP contacts in the preceding 12 months<br>(face-to-face visits and telephone calls) | Categorical<br>0-4, 5-9, 10-14, 15-19, >=20     | From CPRD consultation file.                                                                                                                                                                                                                                                                                                                                     |
| Distance from GP to nearest acute provider<br><br>Distance from GP to nearest MH provider     | Categorical<br>0-3km, 3-6km, 6-9km, >9km        | We provided CPRD with a look-up table of all postcodes in England, the estimated straight line distance from the postcode to the nearest mental health and acute hospital provider. CPRD carried out the linkage using contributing practices' post-code information. Once linked, distances were categorised into distance bands by CPRD e.g. 0-3km, 3-6km etc. |
| GP practice in rural area                                                                     | Binary                                          | To construct a practice level rurality flag we provided CPRD with a look-up table of all lower layer super output area (LSOA) levels (small areas) in England                                                                                                                                                                                                    |



|                                                   |                                            |                                                                                                                                                                                                                                            |
|---------------------------------------------------|--------------------------------------------|--------------------------------------------------------------------------------------------------------------------------------------------------------------------------------------------------------------------------------------------|
|                                                   |                                            | and rurality information derived based on the 2011 Rural-Urban Classification for Small Area Geographies (RUC2011). This information was used to link contributing practices to their corresponding rurality flag using the practice LSOA. |
| Calendar year                                     | Binary                                     |                                                                                                                                                                                                                                            |
| Time since first diagnosis                        | Categorical<br>1 year, 1-5 years, >5 years |                                                                                                                                                                                                                                            |
| <b>Defined using the entire patient's history</b> |                                            |                                                                                                                                                                                                                                            |
| Variable                                          | Type                                       | Details                                                                                                                                                                                                                                    |
| Schizophrenia diagnosis                           | Binary                                     | CPRD Read codes<br>(provided in Table 2)                                                                                                                                                                                                   |
| Bipolar diagnosis                                 |                                            |                                                                                                                                                                                                                                            |
| Both schizophrenia and bipolar diagnosis          |                                            |                                                                                                                                                                                                                                            |

## Measures of polypharmacy prevalence

We calculated two measures of polypharmacy prevalence. First, the annual prevalence of polypharmacy as the number of patients with at least one polypharmacy episode in a year divided by the total number of patients observed during that year. Second, the rate of polypharmacy defined as the sum of all patients' polypharmacy days in a year over the sum of all patients' days at risk of polypharmacy in that year.

Our second measure – the rate of polypharmacy – is an improvement over the point estimates of polypharmacy prevalence often reported in the literature. Point estimates of prevalence show what fraction of eligible individuals are prescribed polypharmacy on a given day. Average point estimates of prevalence can be calculated by averaging daily point estimates.

In the following, we prove that the rate of polypharmacy is a weighted average of the point estimates of polypharmacy on each of the 365 days of the year. Instead of assigning an equal weight to each day of the year, our measure puts a different weight according to the ratio of patients at risk on that day over the patients at risk in the entire year.

Let  $POL_{nt}$  and  $POP_{nt}$  be defined as:

$$POL_{nt} = \begin{cases} 1, & \text{if individual } n \text{ is on polypharmacy on day } t \\ 0, & \text{otherwise} \end{cases}$$

$$POP_{nt} = \begin{cases} 1, & \text{if individual } n \text{ is present (at risk) on day } t \\ 0, & \text{otherwise} \end{cases}$$

The average point estimate of polypharmacy prevalence is:

$$\begin{aligned}
 \text{average point estimate} &= \frac{1}{365} \sum_{t=1}^{365} \frac{\text{number of patients on polypharmacy on day } t}{\text{number of patients present (at risk) on day } t} \\
 &= \frac{1}{365} \left( \frac{\sum_{n=1}^N P_{n1}}{\sum_{n=1}^N POP_{n1}} + \dots + \frac{\sum_{n=1}^N P_{n,365}}{\sum_{n=1}^N POP_{n,365}} \right) \\
 &= \frac{\sum_{n=1}^N P_{n1}}{\sum_{n=1}^N POP_{n1}} \left( \frac{1}{365} \right) + \dots + \frac{\sum_{n=1}^N P_{n,365}}{\sum_{n=1}^N POP_{n,365}} \left( \frac{1}{365} \right)
 \end{aligned} \tag{1}$$

The rate of polypharmacy is:

$$\begin{aligned}
 \text{rate} &= \frac{\text{number of polypharmacy days in a year}}{\text{number of days at risk in a year}} \\
 &= \frac{\sum_{n=1}^N \sum_{t=1}^{365} POL_{nt}}{\sum_{n=1}^N \sum_{t=1}^{365} POP_{nt}} \\
 &= \frac{\sum_{n=1}^N P_{n1}}{\sum_{n=1}^N \sum_{t=1}^{365} POP_{nt}} + \dots + \frac{\sum_{n=1}^N P_{n,365}}{\sum_{n=1}^N \sum_{t=1}^{365} POP_{nt}} \\
 &= \frac{\sum_{n=1}^N P_{n1}}{\sum_{n=1}^N POP_{n1}} \left( \frac{\sum_{n=1}^N \sum_{t=1}^{365} POP_{nt}}{\sum_{n=1}^N \sum_{t=1}^{365} POP_{nt}} \right) + \dots + \frac{\sum_{n=1}^N P_{n,365}}{\sum_{n=1}^N POP_{n,365}} \left( \frac{\sum_{n=1}^N \sum_{t=1}^{365} POP_{nt}}{\sum_{n=1}^N \sum_{t=1}^{365} POP_{nt}} \right)
 \end{aligned} \tag{2}$$

From (1) and (2) follows that the two measures differ only in the weights used.

The figure below is the same as the figure in the paper with the addition of the polypharmacy prevalence calculated on 1<sup>st</sup> of January of each calendar year. The trends of the rate of polypharmacy and the point estimate of polypharmacy prevalence are very similar.

**Figure: Measures of polypharmacy prevalence**

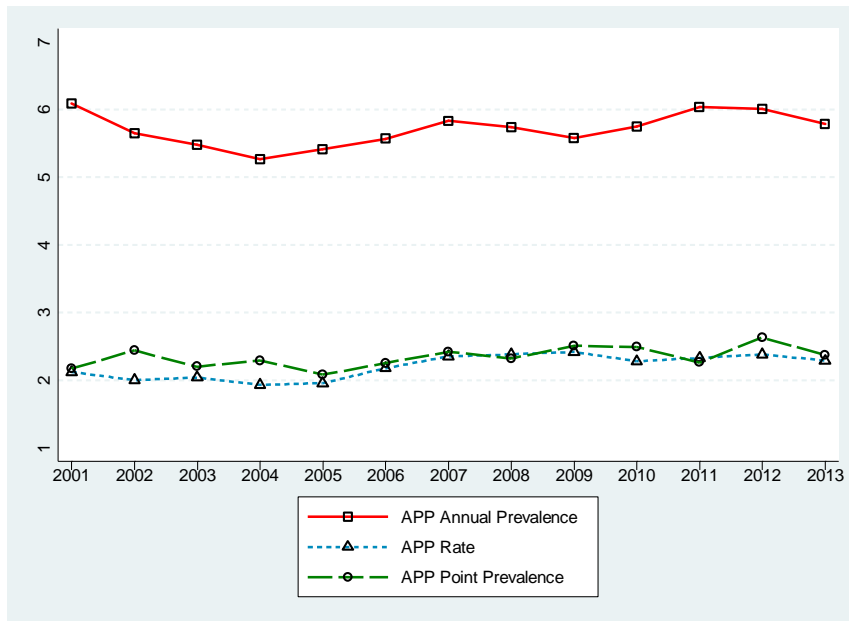

**Figure: APP annual prevalence**

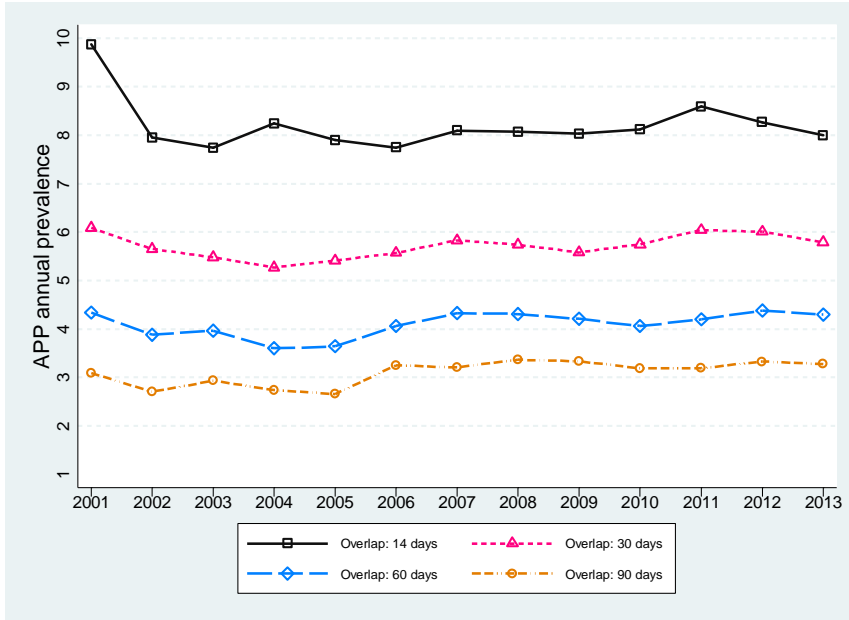

**Figure: Rate of APP**

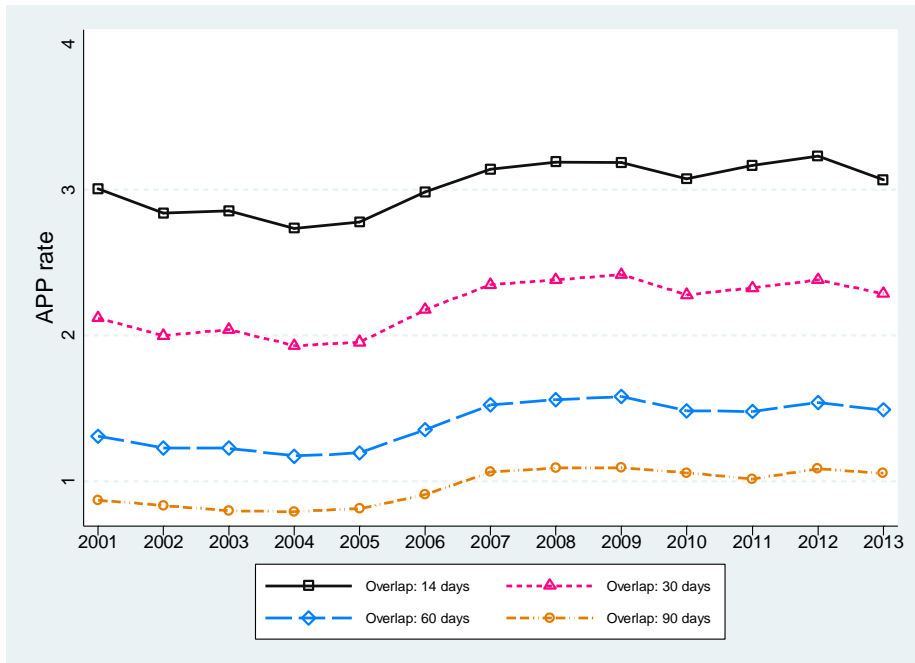

## Survival analysis

Complete linkage of primary, secondary and mortality data provides important information about the timing of APP episodes and the three outcomes. To exploit this rich information, we employ a time-to-event design. Our modelling choice is also supported by the following three features of the data: patients enter the study at different times, they may exit the study before the outcome occurs (right censoring), and APP is a time-varying variable which does not occur at consistent intervals for all patients.

We follow each individual from entry date until the outcome of interest or until censoring.

Censoring may occur because i) a patient dies, ii) registration with the practice ends, or iii) the study period ends (i.e. the patient is still registered on 31 March 2014). We treat death as censoring rather than a competing risk because our focus is on the relationship between quality indicators and outcomes, rather than on the prediction of the probability of an event at a given point in time<sup>3</sup>. While some patients experience multiple events, we consider only the time to first event.

The hazard function for each outcome is specified as:

$$h_i(t) = \lambda_0(t) \exp\{X_{i1}\beta_1 + \dots + X_{ik}\beta_k + \alpha_1 APP_i(t) + \alpha_2 NS_i(t)\} \quad (3)$$

It is the product of the baseline hazard,  $\lambda_0(t)$ , and an exponentiated linear function of time-invariant covariates,  $X_{i1}, \dots, X_{ik}$ , and the two time-varying variables APP(t) and NS(t) indicating whether the patient is on APP at time t and whether the patient is not on an antipsychotic medication at time t.

In survival analysis model without time dependent variables the baseline hazard cancels out and the hazard ratio between two individuals is constant over time. However, the proportionality of hazards does not hold in our case because the time-dependent APP and ALOS change at

different times for different individuals. Estimation of the Cox model via partial likelihood is still feasible.

A hazard ratio (HR) greater than 1 indicates an increase in the hazard of the outcome associated with a unit change in the explanatory variable, and vice versa for a HR below 1.

**Table: Hazard Ratios – Unplanned all and unplanned SMI admissions**

|                             | Unplanned admissions |               | Unplanned SMI admissions |               |
|-----------------------------|----------------------|---------------|--------------------------|---------------|
|                             | HR                   | 95% CI        | HR                       | 95% CI        |
| APP (time varying)          | 1.14                 | (.99 – 1.32)  | 1.19                     | (.92 – 1.53)  |
| No substance (time varying) | 1.08**               | (1.03 – 1.14) | 1.23***                  | (1.13 – 1.35) |
| Age at FSDT                 |                      |               |                          |               |
| 19-35 (base)                |                      |               |                          |               |
| 36-45                       | .95                  | (.86 – 1.04)  | .88                      | (.76 – 1.02)  |
| 46-55                       | .86**                | (.79 – .94)   | .69***                   | (.60 – .79)   |
| 56-65                       | 0.98                 | (.89 – 1.09)  | .56***                   | (.47 – .67)   |
| >=66                        | 1.51***              | (1.37 – 1.67) | .42***                   | (.35 – .51)   |
| Male                        | .99                  | (.90 – 1.10)  | 1.01                     | (.87 – 1.16)  |
| Age at diagnosis*Male       |                      |               |                          |               |
| 19-35*Male (base)           |                      |               |                          |               |
| 36-45*Male                  | .94                  | (.82 – 1.07)  | .96                      | (.81 – 1.16)  |
| 46-55*Male                  | 1.01                 | (.88 – 1.17)  | .96                      | (.78 – 1.18)  |
| 56-65*Male                  | 1.01                 | (.88 – 1.15)  | .92                      | (.71 – 1.20)  |
| >=66* Male                  | 1.09                 | (.96 – 1.25)  | .95                      | (.72 – 1.26)  |
| Year of FSDT                |                      |               |                          |               |
| 2000                        | (base)               |               |                          |               |
| 2001                        | 1.09*                | (1.01 – 1.17) | 1.03                     | (.90 – 1.18)  |
| 2002                        | 1.10*                | (1.00 – 1.21) | .98                      | (.84 – 1.14)  |
| 2003                        | 1.13*                | (1.02 – 1.24) | .88                      | (.73 – 1.07)  |
| 2004                        | 1.17**               | (1.06 – 1.29) | .92                      | (.77 – 1.10)  |
| 2005                        | 1.17**               | (1.06 – 1.28) | .97                      | (.81 – 1.16)  |
| 2006                        | 1.19***              | (1.08 – 1.31) | .92                      | (.77 – 1.11)  |
| 2007                        | 1.11                 | (1.00 – 1.24) | .83                      | (.69 – 1.01)  |
| 2008                        | 1.14**               | (1.04 – 1.25) | .82*                     | (.68 – .98)   |
| 2009                        | 1.10                 | (.99 – 1.23)  | .82*                     | (.68 – .99)   |
| 2010                        | 1.10                 | (.99 – 1.26)  | .81*                     | (.67 – .98)   |
| 2011                        | 1.16**               | (1.04 – 1.29) | .85                      | (.70 – 1.02)  |
| 2012                        | 1.21**               | (1.08 – 1.37) | .86                      | (.67 – 1.10)  |
| 2013                        | .94                  | (.79 – 1.13)  | .70                      | (.49 – 1.01)  |

|                                                                     |         |               |         |               |
|---------------------------------------------------------------------|---------|---------------|---------|---------------|
| 2014                                                                | .99     | (.54 – 1.85)  | .76     | (.25 – 2.32)  |
| Time since diagnosis                                                |         |               |         |               |
| < 1 year                                                            |         |               |         |               |
| 1-5 years                                                           | .97     | (.91 – 1.03)  | 1.22*** | (1.11 – 1.34) |
| >5 years                                                            | .86***  | (.81 – .90)   | 1.15**  | (1.04 – 1.27) |
| IMD                                                                 |         |               |         |               |
| 1st quintile (base)                                                 |         |               |         |               |
| 2nd quintile                                                        | 1.00    | (.93 – 1.08)  | .98     | (.86 – 1.12)  |
| 3rd quintile                                                        | 1.08    | (.99 – 1.17)  | 1.01    | (.87 – 1.19)  |
| 4th quintile                                                        | 1.11*   | (1.02 – 1.20) | 1.03    | (.90 – 1.18)  |
| 5th quintile                                                        | 1.21*** | (1.11 – 1.31) | 1.16*   | (1.01 – 1.33) |
| Ethnicity white                                                     | 2.26*** | (2.11 – 2.41) | 2.11*** | (1.86 – 2.34) |
| Practice is in rural area                                           | .96     | (.89 – 1.04)  | .97     | (.82 – 1.15)  |
| Minimum distance to acute health services                           |         |               |         |               |
| <3km (base)                                                         |         |               |         |               |
| 3-6km                                                               | 1.03    | (.97 – 1.09)  | 1.04    | (.91 – 1.18)  |
| 6-9km                                                               | .92     | (.84 – 1.01)  | .97     | (.82 – 1.16)  |
| >9km                                                                | 1.02    | (.94 – 1.11)  | .98     | (.82 – 1.18)  |
| Minimum distance to mental health services                          |         |               |         |               |
| <3km (base)                                                         |         |               |         |               |
| 3-6km                                                               | .99     | (.92 – 1.07)  | .96     | (.82 – 1.14)  |
| 6-9km                                                               | 1.03    | (.95 – 1.12)  | 1.00    | (.84 – 1.20)  |
| >9km                                                                | .98     | (.90 – 1.06)  | .97     | (.81 – 1.16)  |
| Number of primary care contacts within 12 months prior to diagnosis |         |               |         |               |
| <5 (base)                                                           |         |               |         |               |
| 5-9                                                                 | 1.05    | (.99 – 1.12)  | .88*    | (.80 – .97)   |
| 10-14                                                               | 1.08*   | (1.01 – 1.16) | .84***  | (.76 – .93)   |
| 15-19                                                               | 1.18*** | (1.10 – 1.27) | .85*    | (.75 – .96)   |
| >=20                                                                | 1.30*** | (1.22 – 1.39) | .85**   | (.75 – .96)   |
| Current or ex-smoker                                                | 1.08**  | (1.02 – 1.14) | 1.04    | (.94 – 1.15)  |
| Current or ex-alcohol user                                          | .97     | (.93 – 1.02)  | 1.03    | (.95 – 1.11)  |
| Number of Charlson Index comorbidities                              | 1.22*** | (1.18 – 1.25) | .94     | (.88 – 1.00)  |
| Diagnosis of depression                                             | 1.02    | (.97 – 1.06)  | .84***  | (.77 – .90)   |
| SMI diagnosis group                                                 |         |               |         |               |
| Bipolar disorder or affective psychosis (base)                      |         |               |         |               |
| Schizophrenia or other psychosis                                    | 1.02    | (.97 – 1.07)  | 1.10*   | (1.01 – 1.20) |
| Both                                                                | 1.20*** | (1.12 – 1.29) | 1.77*** | (1.58 – 1.98) |

\*p<0.05, \*\*p<0.01, \*\*\*p<0.001



**Table: Hazard Ratios – Death and ED presentations**

|                             | Death    |                 | ED presentations |               |
|-----------------------------|----------|-----------------|------------------|---------------|
|                             | HR       | 95% CI          | HR               | 95% CI        |
| APP (time varying)          | 1.02     | (.76 – 1.37)    | 0.95             | (.80 – 1.14)  |
| No substance (time varying) | 1.02     | (.94 – 1.10)    | 1.19***          | (1.14 – 1.24) |
| Age at FSDT                 |          |                 |                  |               |
| 19-35 (base)                |          |                 |                  |               |
| 36-45                       | 2.53***  | (1.57 – 4.09)   | .86**            | (.78 – .95)   |
| 46-55                       | 4.34***  | (2.82 – 6.66)   | .75***           | (.68 – .82)   |
| 56-65                       | 9.22***  | (6.09 – 13.97)  | .71***           | (.64 – .79)   |
| >=66                        | 31.72*** | (21.38 – 47.05) | 1.02             | (.93 – 1.12)  |
| Male                        | 1.98**   | (1.27 – 3.09)   | .97              | (.88 – 1.07)  |
| Age at diagnosis*Male       |          |                 |                  |               |
| 19-35*Male (base)           |          |                 |                  |               |
| 36-45*Male                  | .77      | (.45 – 1.32)    | .97              | (0.84 – 1.13) |
| 46-55*Male                  | .74      | (.45 – 1.21)    | 1.05             | (.91 – 1.20)  |
| 56-65*Male                  | .63      | (.39 – 1.02)    | 1.10             | (.95 – 1.28)  |
| >=66* Male                  | .60*     | (.39 – .94)     | 1.03             | (.89 – 1.18)  |
| Year of FSDT                |          |                 |                  |               |
| 2000                        |          |                 |                  |               |
| 2001                        | .95      | (.82, – 1.09)   |                  |               |
| 2002                        | 1.16     | (1.00, – 1.34)  |                  |               |
| 2003                        | 1.04     | (.88, – 1.23)   |                  |               |
| 2004                        | 1.19*    | (1.00, – 1.42)  |                  |               |
| 2005                        | 1.07     | (.89, – 1.27)   |                  |               |
| 2006                        | 1.09     | (.88 – 1.34)    |                  |               |
| 2007                        | 1.10     | (.89 – 1.35)    |                  |               |
| 2008                        | 1.14     | (.93 – 1.40)    | 1.21***          | (1.11 – 1.31) |
| 2009                        | 1.08     | (.88 – 1.32)    | 1.27***          | (1.14 – 1.40) |
| 2010                        | .89      | (.67 – 1.17)    | 1.56***          | (1.39 – 1.76) |
| 2011                        | 1.42*    | (1.07 – 1.88)   | 1.59***          | (1.43 – 1.76) |
| 2012                        | 1.29     | (.91 – 1.83)    | 1.64***          | (1.47 – 1.84) |
| 2013                        | .80      | (.45 – 1.42)    | 1.57***          | (1.36 – 1.82) |
| 2014                        | .00      | (.00 – .00)     | 1.64             | (.98 – 2.74)  |
| Time since diagnosis        |          |                 |                  |               |
| < 1 year                    |          |                 |                  |               |
| 1-5 years                   | 1.01     | (.91 – 1.13)    | .97              | (.90 – 1.05)  |
| >5 years                    | .76***   | (.68 – .85)     | .90**            | (.84 – .96)   |
| IMD                         |          |                 |                  |               |
| 1st quintile (base)         |          |                 |                  |               |
| 2nd quintile                | .92      | (.80 – 1.06)    | 1.07             | (.97 – 1.18)  |
| 3rd quintile                | 1.06     | (.93 – 1.20)    | 1.11*            | (1.00 – 1.23) |

|                                                                     |         |               |         |               |
|---------------------------------------------------------------------|---------|---------------|---------|---------------|
| 4th quintile                                                        | .99     | (.86 – 1.14)  | 1.18**  | (1.06 – 1.31) |
| 5th quintile                                                        | 1.05    | (.91 – 1.22)  | 1.31*** | (1.17 – 1.47) |
| Ethnicity white                                                     | .92     | (.83 – 1.02)  | 1.49*** | (1.40 – 1.58) |
| Practice is in rural area                                           | 1.03    | (.88 – 1.20)  | .85*    | (.75 – .97)   |
| Minimum distance to acute health services                           |         |               |         |               |
| <3km (base)                                                         |         |               |         |               |
| 3-6km                                                               | 1.07    | (.95 – 1.20)  | .92     | (.83 – 1.02)  |
| 6-9km                                                               | 1.11    | (.96 – 1.29)  | .90     | (.78 – 1.05)  |
| >9km                                                                | 1.17    | (.99 – 1.34)  | .99     | (.85 – 1.17)  |
| Minimum distance to mental health services                          |         |               |         |               |
| <3km (base)                                                         |         |               |         |               |
| 3-6km                                                               | .95     | (.82 – 1.10)  | 1.02    | (.90 – 1.16)  |
| 6-9km                                                               | .96     | (.82 – 1.12)  | .97     | (.85 – 1.10)  |
| >9km                                                                | .97     | (.83 – 1.14)  | .88     | (.77 – 1.00)  |
| Number of primary care contacts within 12 months prior to diagnosis |         |               |         |               |
| <5 (base)                                                           |         |               |         |               |
| 5-9                                                                 | 1.04    | (.91 – 1.18)  | 1.12**  | (1.04 – 1.20) |
| 10-14                                                               | 1.06    | (.93 – 1.21)  | 1.22*** | (1.13 – 1.33) |
| 15-19                                                               | 1.28**  | (1.10 – 1.48) | 1.37*** | (1.25 – 1.50) |
| >=20                                                                | 1.28*** | (1.11 – 1.48) | 1.59*** | (1.46 – 1.73) |
| Current or ex-smoker                                                | .93     | (.85 – 1.03)  | 1.07*   | (1.01 – 1.14) |
| Current or ex-alcohol user                                          | .83***  | (.76 – .92)   | .98     | (.92 – 1.04)  |
| Number of Charlson Index comorbidities                              | 1.43*** | (1.37 – 1.49) | 1.14*** | (1.11 – 1.18) |
| Diagnosis of depression                                             | .89**   | (.81 – .96)   | 1.07**  | (1.02 – 1.13) |
| SMI diagnosis group                                                 |         |               |         |               |
| Bipolar disorder or affective psychosis (base)                      |         |               |         |               |
| Schizophrenia or other psychosis                                    | 1.42*** | (1.29 – 1.56) | .94*    | (.89 – 1.00)  |
| Both                                                                | 1.07    | (.93 – 1.25)  | 1.02    | (.94 – 1.09)  |

\*p<0.05, \*\*p<0.01, \*\*\*p<0.001

## Online-Only References

1. Springate D, Kontopantelis E, Ashcroft D, et al. ClinicalCodes: An online clinical codes repository to improve the validity and reproducibility of research using electronic medical records. *PLoS ONE* 2014;9(6) doi: 10.1371/journal.pone.0099825
2. Windfuhr K, While D, Kapur N, et al. Suicide risk linked with clinical consultation frequency, psychiatric diagnoses and psychotropic medication prescribing in a national study of primary-care patients. *Psychological Medicine* 2016;46:3407-17.
3. Noordzij M, Leffondré K, van Stralen KJ, et al. When do we need competing risks methods for survival analysis in nephrology? *Nephrology Dialysis Transplantation* 2013;28(11):2670-77.
